# Supplementary material for: Modifiable Factors Driving Medical Students’ Choice of Anesthesiology: A Multicenter Group Concept Mapping Study
Source: Research Square preprint supplement (doi:10.21203/rs.3.rs-8389147/v1), 2025-12-31
Supplement: Supplementary file 1 [file 6cc08a4532c60efb7e3e7128.docx]

**Supplementary Material**

| **Rank** | **Statement (DE)** | **Statement (EN)** | **N** | **Mean ± SD** |
| --- | --- | --- | --- | --- |
| 1 | Interesse am Fach | Interest in the discipline | 37 | 4.81 ± 1.76 |
| 2 | Breites Arbeitsspektrum (OP/Intensivstation/Notarzt/Schmerzmedizin/Palli) | Breadth of practice/opportunities (OR/ICU/emergency medicine/pain medicine/palliative care) | 37 | 4.70 ± 1.27 |
| 3 | Respektvoller Umgang im Team | Respectful interaction within the team | 38 | 4.68 ± 1.63 |
| 4 | Erlernen von Notfallkompetenzen | Acquisition of emergency and critical care skills | 38 | 4.61 ± 1.64 |
| 5 | Arbeitsatmosphäre | Posititive work atmosphere | 35 | 4.60 ± 1.59 |
| 6 | Sympathisches Team | Friendly team | 37 | 4.57 ± 1.57 |
| 7 | Anwendung und Erlernen praktischer Fähigkeiten am Patienten | Application and learning of practical skills on patients | 39 | 4.49 ± 1.64 |
| 7 | Arbeitsbedingungen | Working conditions | 37 | 4.49 ± 1.57 |
| 9 | Zufriedenheit des Teams | Team satisfaction | 37 | 4.46 ± 1.69 |
| 10 | Motivation der SupervisorInnen | Motivation of supervisors | 36 | 4.44 ± 1.30 |
| 11 | Rückhalt von Oben bei Fehlern | Support from superiors in case of errors | 37 | 4.41 ± 1.42 |
| 12 | Betreuung während des PJs | Supervision during the final year | 38 | 4.39 ± 1.39 |
| 13 | Freude an der Intensivmedizin | Enjoyment of intensive care medicine | 38 | 4.37 ± 1.65 |
| 14 | Teamarbeit | Teamwork | 36 | 4.33 ± 1.60 |
| 15 | Offene Fehlerkultur | Open error culture | 38 | 4.26 ± 1.72 |
| 16 | Betreuende Ärztinnen (als Vorbild) | Supervising physicians (as role models) | 35 | 4.20 ± 1.41 |
| 17 | Interdisziplinäre Zusammenarbeit | Interdisciplinary collaboration | 37 | 4.19 ± 1.31 |
| 17 | Realistischer Eindruck des Arbeitsalltags | Realistic impression of daily work | 37 | 4.19 ± 1.47 |
| 17 | Gute Organisation (des PJs) | Good organization (of the final year) | 37 | 4.19 ± 1.41 |
| 20 | Teamgeist | Team spirit | 35 | 4.17 ± 1.71 |
| 21 | Qualität des Ausbildungskonzepts für AssistentInnen | Quality of training concept for assistants | 37 | 4.16 ± 1.62 |
| 22 | Erfahrungsaustausch mit anderen ÄrztInnen | Exchange of experience with other physicians | 38 | 4.13 ± 1.49 |
| 23 | Qualität des PJ-Unterrichts | Quality of teaching in the final year | 35 | 4.11 ± 1.43 |
| 23 | Typ Mensch in der Fachrichtung | Type of person in the specialty | 37 | 4.11 ± 1.58 |
| 23 | Flache Hierarchien | Flat hierarchies | 37 | 4.11 ± 1.54 |
| 23 | Lernstandsadaptierte Übertragung von Aufgaben | Delegation of tasks adapted to learning level | 38 | 4.11 ± 1.39 |
| 27 | Ausgearbeitete Lehr-/Ausbildungskonzepte im PJ (PJ-Unterricht) | Developed teaching/training concepts in the final year | 37 | 4.08 ± 1.36 |
| 27 | Spaß an Notfallmedizin | Fun in emergency medicine | 37 | 4.08 ± 1.61 |
| 27 | Interprofessionelle Zusammenarbeit | Interprofessional collaboration | 38 | 4.08 ± 1.58 |
| 30 | Impression der Oberärztinnen | Impression of senior physicians | 36 | 4.06 ± 1.33 |
| 31 | Anerkennung der PJler als Teil des Teams | Recognition of medical students in their final year as part of the team | 38 | 4.05 ± 1.61 |
| 31 | Implementierung neuer wissenschaftlicher Erkenntnisse in den Arbeitsalltag | Implementation of new scientific findings in daily work | 38 | 4.05 ± 1.29 |
| 33 | Work-life-Balance | Work-life balance | 36 | 3.94 ± 1.66 |
| 33 | Selbstständigkeit beim Arbeiten | Independence at work | 36 | 3.94 ± 1.37 |
| 35 | Positive (Vor-) Erfahrungen | Positive (previous) experiences | 36 | 3.89 ± 1.62 |
| 36 | Moderne Führungskultur | Modern leadership culture | 37 | 3.86 ± 1.67 |
| 37 | Einarbeitungskonzepte neuer AssistenzärztInnen | Onboarding concepts for new assistant physicians | 37 | 3.84 ± 1.86 |
| 38 | Lehre zu betreiben | Conducting teaching | 36 | 3.83 ± 1.61 |
| 39 | Motivation der Studierenden | Motivation of students | 37 | 3.78 ± 1.73 |
| 40 | Workload | Workload | 37 | 3.73 ± 1.35 |
| 41 | Größe des Krankenhauses | Hospital size | 36 | 3.69 ± 1.62 |
| 42 | Vereinbarkeit von Familie und Beruf | Compatibility of family and work | 38 | 3.68 ± 1.68 |
| 42 | Interesse an Patho- und Physiologie | Interest in pathology and physiology | 38 | 3.68 ± 1.71 |
| 44 | Karrierechancen | Career opportunities | 36 | 3.67 ± 1.41 |
| 45 | Planbare Arbeitszeit | Plannable working time | 38 | 3.66 ± 1.55 |
| 46 | Wohnort | Place of residence | 37 | 3.65 ± 1.74 |
| 46 | Art des Arbeitsplatzes (OP-Saal/Station/Büro) | Type of workplace (OR/ward/office) | 37 | 3.65 ± 1.42 |
| 48 | Ausprägung von Sexismus in verschiedenen Fachrichtungen | Manifestation of sexism in various specialties | 34 | 3.62 ± 1.74 |
| 49 | Umgang mit Teilzeit-flexiblen Arbeitszeitmodellen | Handling of part-time/flexible working time models | 38 | 3.53 ± 1.61 |
| 50 | Impression des Chefarztes / der Chefärztin | Impression of chief physician | 37 | 3.51 ± 1.46 |
| 50 | Digitalisierung der Arbeitsumgebung (Dienstplan/Kommunikation/Logbuch) | Digitalization of work environment (schedule/communication/logbook) | 37 | 3.51 ± 1.33 |
| 52 | Forschung zu betreiben | Conducting research | 37 | 3.46 ± 1.80 |
| 52 | Ausprägung von Rassismus in verschiedenen Fachrichtungen | Manifestation of racism in various specialties | 35 | 3.46 ± 1.79 |
| 54 | Durchführung von Simulatortrainings | Conducting simulator trainings | 37 | 3.19 ± 1.70 |
| 55 | Kennenlernen des ökonomisierten Systems Krankenhaus | Getting to know the economized hospital system | 37 | 2.81 ± 1.51 |
| 56 | Möglichkeit der Niederlassung | Possibility of private practice | 37 | 2.73 ± 1.50 |

*Supplementary Table 1. Item-level relevance ratings of career-related statements in anaesthesiology, presented in German and English. Statements are ranked by descending mean score. The table includes the number of respondents per item (N), as well as the mean and standard deviation (SD) of the ratings on a 5-point scale (1 = not at all relevant, 5 = highly relevant).*
